# Supplementary material for: The Genetic Base for Peanut Height-Related Traits Revealed by a Meta-Analysis
Source: MDPI journal article supplement (doi:10.3390/plants10061058), 2021-05-25
Supplement: s1 [file s1]

**Table S2.** A summary of the acquired SNPs and InDels in different genic and intergenic regions.

| Type             | InDels | Percentage | SNPs   | Percentage |
|------------------|--------|------------|--------|------------|
| Intergenic       | 1,119  | 71.68%     | 14,019 | 90.12%     |
| Exonic           | 79     | 5.06%      | 474    | 3.05%      |
| Intronic         | 216    | 13.84%     | 588    | 3.78%      |
| Up-/ down-stream | 147    | 9.42%      | 475    | 3.05%      |
| Total            | 1,561  |            | 15,556 |            |

**Table S3.** The correlation among the plant height related traits.

|     | Ph       | Fbl      | Nsk      |
|-----|----------|----------|----------|
| Ph  | 1        | 0.636356 | 0.552309 |
| Fbl | 0.636356 | 1        | 0.568581 |
| Nsk | 0.552309 | 0.568581 | 1        |
